## **Mechanisms underlying higher order interactions: from quantitative definitions to ecological processes**

Andrew R. Kleinhesselink<sup>1</sup>, Nathan J.B. Kraft<sup>1</sup>, Jonathan M. Levine<sup>2</sup>,

<sup>1</sup>Department of Ecology and Evolutionary Biology, University of California, Los Angeles  
621 Charles E. Young Drive South, Los Angeles, USA

<sup>2</sup>Department of Ecology and Evolutionary Biology, Princeton University

Running Head: *Higher Order Interactions*

**Key words:** *resource competition, interaction modification, phenology, annual plants*

Submission Type: Article

Main Text Word Count: 6128 (including abstract)

Total Word Count: 8359 (including appendix and literature cited)

Total Pages: 44 (including appendix)

Parts: Main text, Supporting Information Figures and Tables, Appendix A, Computer

Code (zip file)

1 **Abstract**

2           When species simultaneously compete with two or more species of competitor,  
3 higher order interactions (HOIs) can lead to emergent properties not present when species  
4 interact in isolated pairs. In order to extend ecological theory to multi-competitor  
5 communities, ecologists must develop a practical and general definition for HOIs that can  
6 be applied to a wide range of competition models. In this paper we propose a definition  
7 for HOIs and outline a set of criteria for testing whether a model has or does not have  
8 HOIs. These criteria are valuable for empirical ecologists in need of clarity when  
9 discussing HOIs in empirical data. We also provide thorough discussion of how our  
10 definition compares with previous definitions of HOIs and interaction modification in the  
11 literature. In the second part of the paper we demonstrate the steps required for a rigorous  
12 test of HOIs in empirical data. To do this we simulate resource competition between three  
13 annual plant species which differ in phenology. We then fit phenomenological  
14 competition models to the outcome of simulated competition and use these to test for the  
15 presence of HOIs. In our simulations, we find the strength of HOIs varies with  
16 phenology: species that grow later experience stronger HOIs than earlier growing species.  
17 Our simulation shows how HOIs could emerge in ecosystems where resource availability  
18 and individual size change rapidly throughout the course of the growing season and  
19 where there are differences in the timing of resource acquisition between competitors.  
20

## 21 **Introduction**

22           Almost all species interact with a diversity of predators, pathogens and  
23 competitors. Despite this, most classical models in community ecology assume that the  
24 per capita effects of each species on each other do not depend on the densities of any  
25 other species in the community. This simplifying assumption means that we can predict  
26 the dynamics of multispecies communities from a model that only includes the  
27 interaction between each pair of species (Chesson 2000, Levine et al. 2017).

28           Higher order interactions (HOIs) between species invalidate the core assumption  
29 of independent per capita interactions and thus HOIs could have profound consequences  
30 for modeling community dynamics and species coexistence (Neill 1974, Mayfield and  
31 Stouffer 2017, Levine et al. 2017, Grilli et al. 2017). If HOIs are strong, even a perfect  
32 understanding of the interaction between each and every pair of species in isolation  
33 would not be sufficient to describe what happens when all the species are simultaneously  
34 interacting (Neill 1974, Billick and Case 1994, Levine et al. 2017). A specific example of  
35 the potential for HOIs to impact our understanding of community dynamics is in the  
36 application of the mutual invasibility criterion for determining the stability of coexistence  
37 (Levine et al. 2017). In theory, HOIs can allow three competitor species to coexist even  
38 where some pairs of competitors cannot coexist (Grilli et al. 2017).

39           Despite the theoretical importance of HOIs, measuring HOIs in nature has been  
40 impeded by shifting definitions of what does and does not count as an HOIs (Pomerantz  
41 1981, Adler and Morris 1994, Billick and Case 1994, Letten and Stouffer 2019).  
42 Moreover, previous definitions of HOIs were developed with a small range of classical

43 competition models in mind. Since that time, new statistical modeling software now  
44 allows ecologists to fit a much wider range of interaction models (Mayfield and Stouffer  
45 2017). This increase in model flexibility requires deriving a more general definition for  
46 HOIs that can be applied to any density dependent model of population dynamics.

47 In addition, to the basic issue of producing a shared definition for HOIs,  
48 ecologists lack a mechanistic understanding of how HOIs could emerge in nature (Levine  
49 et al. 2017, Letten and Stouffer 2019). Such an understanding is necessary for predicting  
50 the sets of competitors and ecosystems where strong HOIs are likely. One promising way  
51 to address these outstanding issues is to simulate virtual competition experiments based  
52 on mechanistic models in which the processes that cause competition are fully known,  
53 and then evaluate for which species, and under which conditions HOIs emerge (Letten  
54 and Stouffer 2018).

55 We provide a general definition for HOIs based on interaction modification that  
56 distinguishes HOIs from related phenomena such as non-linear density dependence and  
57 indirect effects. In the second part of the paper, we use a simulation experiment to  
58 illustrate how our definition can be applied to properly identify interaction modification  
59 even against a backdrop of nonlinear density dependence. We then use the results of the  
60 simulation to shed light on possible mechanisms that could generate HOIs in nature.

### 61 *Higher order interactions result from interaction modification*

62 For the purpose of defining HOIs we focus on modeling a focal species'  
63 performance (usually per capita population growth rate) as a function of the population  
64 density of multiple species of competitor. This can be expressed generally as,

$$\frac{1}{n_i} \frac{dn_i}{dt} = F_i(n_1, \dots, n_m), \quad (1)$$

65 where  $F_i$  gives the per capita population growth rate of the focal species  $i$ , and  $n_j$  are the  
66 population densities of competitor species one through  $m$  in the community, including the  
67 population density of the focal species,  $n_i$ . An analogous equation holds for population  
68 growth rate over discrete time intervals:  $\frac{n_i(t+1)}{n_i(t)} = F_i(n_1, \dots, n_m)$ . In most widely used  
69 models of species interactions, each competitor has one effect on itself and one effect on  
70 each of the other species in the community. The simplest example of such a pairwise  
71 competition model is the Lotka-Volterra (LV) model,

$$\frac{1}{n_i} \frac{dn_i}{dt} = r_i \left( 1 - \sum_{j=1}^m \alpha_{ij} n_j \right), \quad (2)$$

72 where,  $r_i$  is the intrinsic rate of growth of the focal species  $i$  and  $\alpha_{ij}$  is the per capita  
73 effect of competitor  $j$  on the growth rate of the focal species. This model is pairwise  
74 because each interaction is specified by the pair of species involved, the focal species  $i$   
75 and the competitor  $j$ . The defining property of any pairwise model, such as the LV model,  
76 is that the per capita effect of each species of competitor is independent of the densities of  
77 any *other* species of competitor (Figure 1A).

78 By contrast, interaction modification disrupts pairwise competition and leads to  
79 HOIs. Interaction modification occurs when the effect of one competitor species is  
80 modified by the density of another competitor species (Adler and Morris 1994). We can  
81 introduce an interaction modification into the LV model by replacing any of the constant  
82 terms  $\alpha_{ij}$  with a function of the density of another competitor (Billick and Case 1994).

83 For instance, in the following LV model, the focal species performance is dependent on  
84 two competitor species,

$$\frac{1}{n_i} \frac{dn_i}{dt} = F_i(n_1, n_2) = r_i(1 - \alpha_{i1}n_1 - \alpha_{i2}n_2). \quad (3)$$

85 Replacing the term  $\alpha_{i1}$  with the expression  $\alpha_{i1} + \beta_{i(12)}n_2$ , makes the per capita effect of  
86 species one dependent on the density of another competitor,  $n_2$ . More specifically the  
87 parameter  $\beta_{i(12)}$  measures the strength of this interaction modification (Figure 1B).  
88 Substituting this function into the model introduces the product of competitors one and  
89 two as a new term,

$$\frac{1}{n_i} \frac{dn_i}{dt} = F_i^{HOI}(n_1, n_2) = r_i(1 - \alpha_{i1}n_1 - \alpha_{i2}n_2 - \beta_{i(12)}n_1n_2). \quad (4)$$

90 Interaction modifications such as these imply that competition is functionally different  
91 when more than one competitor species is present and that there are emergent properties  
92 in the community that cannot be predicted by single species effects. These may suggest  
93 specific biological hypotheses: something about the behavior or traits of the competitors  
94 are functionally distinct when they are together as compared to when they are separate.  
95 Importantly, an interaction modification cannot be attributed to any one competitor—  
96 rather it is an emergent property of the multi-species system, what we call an HOI (Figure  
97 1B).

### 98 *An improved general definition of HOIs*

99 While the section above captures the essential connection between interaction  
100 modifications and HOIs, ecologists do not have a shared definition for HOIs that captures

101 this idea and which can be applied to any density dependent model of competition  
102 (Hairston et al. 1968, Pomerantz 1981, Billick and Case 1994, Grilli et al. 2017, Letten  
103 and Stouffer 2019). Here we provide a formal mathematical definition for HOIs rooted in  
104 their important implications for ecological theory and which can be applied to any  
105 interaction model of any functional form. We first present this more formal definition but  
106 follow up with a simple empirical heuristic which can be used to evaluate a model for  
107 HOIs.

108 Let  $F_i(n_1, \dots, n_m)$  be a generic model describing the density dependent effects of  
109  $m$  competitor species on the per capita growth of species  $i$ , where  $m > 1$ . Let  $\Theta$  be the set  
110 of all parameters in the model,  $\Theta = \{\theta \mid F_i(n_1, \dots, n_m \mid \theta)\}$ . Here, the term parameter refers  
111 to constants in a model that are not themselves dependent variables (Bard 1974). Let  
112  $f_{ij}(n_j)$  be a model describing the response of the focal species to competition from a  
113 single competitor species,  $j$ , where  $j$  is one of the competitor species included in  
114  $F_i(n_1, \dots, n_m)$ . For any model  $F_i$ , we find  $f_{ij}(n_j)$  by setting the densities of all  
115 competitors except  $j$  to zero and simplifying the model. Next, let  $\Psi_j$  be the set of  
116 parameters in  $f_{ij}(n_j)$ ,  $\Psi_j = \{\psi \mid f_{ij}(n_j \mid \psi)\}$ . For most realistic competition models the  
117 parameters in  $\Psi_j$  will be a subset of those in  $\Theta$ , i.e.  $\Psi_j \subseteq \Theta$ . Next, let  $\Phi$  be the set of all  
118 parameters found across all  $m$  sets  $\Psi_j$ :  $\Phi = \Psi_1 \cup \Psi_2 \cup \dots \cup \Psi_m = \bigcup_{j=1}^m \Psi_j$ . A model is  
119 pairwise if all parameters in  $\Theta$  are found in the set  $\Phi$ , i.e.  $\Theta = \Phi$ . **Models with HOIs are**  
120 **defined by having parameters in  $F_i$  that are not found in the  $m$  single-competitor**  
121 **functions, or more precisely, when  $\Theta$  is a proper superset of  $\Phi$ ,  $\Theta \supset \Phi$ .** Finally, let B

122 be the set of parameters in  $\Theta$  but not in  $\Phi$ ,  $B = \Theta - \Phi$ . The parameters in  $B$  are those that  
123 define the HOI in the model.

124 As a concrete illustration of our definition, consider the two competitor LV model  
125 defined in equation (3): for the full model  $\Theta = \{\alpha_{i1}, \alpha_{i2}, r_i\}$  and  $\Phi = \bigcup_{j=1}^2 \Psi_j =$   
126  $\{\alpha_{i1}, \alpha_{i2}, r_i\}$ , thus  $\Theta = \Phi$  and the model is pairwise. By contrast, for the HOI model  $F_i^{HOI}$   
127 defined in equation (4),  $\Theta = \{\alpha_{i1}, \alpha_{i2}, \beta_{i(12)}, r_i\}$  and  $\Phi = \bigcup_{j=1}^2 \Psi_j = \{\alpha_{i1}, \alpha_{i2}, r_i\}$ , thus  
128  $\Theta \supset \Phi$  and the model contains HOIs. Moreover,  $B = \Theta - \Phi = \{\beta_{i(12)}\}$ , thus the  
129 parameter  $\beta_{i(12)}$  is specifically the one that captures the HOI.

130 This abstract representation belies a simple empirical heuristic for determining  
131 whether a model has HOIs: in order to parameterize a model with HOIs, the response of  
132 the focal species must be measured against density gradients of each competitor  
133 separately, as well as against varying combinations of competitors grown together  
134 (Figure 2). This is a natural consequence of the above definition. *In essence, a model with*  
135 *HOIs includes additional parameters that an empiricist cannot measure when the*  
136 *response of a focal individual is measured against a single competitor species*  
137 *(Pomerantz 1981)*. Note, however, there is no way to determine whether there are HOIs  
138 among  $m$  competitors by examining all  $m$  pairwise models  $f_{ij}$ , rather the form for the  
139 multi-competitor model  $F_i$  must be chosen first in order to apply any HOI definition  
140 (Adler and Morris 1994).

141 We refer to the type of HOIs captured by our definition above as *hard HOIs* and  
142 contrast them with the wider phenomenon of non-linear density dependence which  
143 produces what we term *soft HOIs*. A general test for soft HOIs is to take the partial



144 derivative of the competition function,  $F_i$  in equation (1), with respect to the density of a  
145 single competitor species,  $\frac{\partial F_i}{\partial n_j}$ . This partial derivative defines the focal species' sensitivity  
146 to a single competitor. If this partial derivative is a function of more than one  
147 competitors' density, then there are soft HOIs. In general, all models with hard HOIs will  
148 be non-linear and have soft HOIs, but not all non-linear models will have hard HOIs.  
149 This is similar to definitions used in earlier discussions of HOIs based on LV forms of  
150 competition (Case and Bender 1981), and closely follows the verbal argument that HOIs  
151 emerge when the effect of one competitor on another depends on any other competitors.  
152 The problem is that **any model in which growth is a nonlinear function of**  
153 **interspecific density will involve soft HOIs**, and thus this definition does not distinguish  
154 interaction modification or HOIs from non-linear density dependence (Pomerantz 1981,  
155 Adler and Morris 1994). As an example consider the multi-competitor Hassel model  
156 (Hassell and Comins 1976),

$$\frac{n_i(t+1)}{n_i(t)} = F(n_1, \dots, n_m) = \lambda_i \left( 1 + \sum_j \alpha_{ij} n_j \right)^{-\tau_i}, \quad (5)$$

157 where  $\lambda_i > 0$  is the maximum per capita seed production,  $\alpha_{ij}$  is the per capita effect of  
158 species  $j$  on species  $i$  and  $\tau_i > 0$  allows each focal species to respond differently to the  
159 sum of competitor effects. This function has the partial derivative  $\frac{\partial F_i}{\partial n_j} = -\alpha_{ij} \lambda_i (1 +$   
160  $\sum_i \alpha_{ij} n_j)^{-\tau_i - 1}$ . Thus, the effect of competitor  $j$  on the focal species  $i$  is a function of the  
161 density of all other competitor species. However, as in the LV model, there are no hard  
162 HOIs in this model by our definition because all of the parameters in the multi-competitor

163 model are also found in the  $m$  separate single competitor functions, i.e.  $\Theta = \Phi =$   
164  $\{\alpha_{i1}, \dots, \alpha_{im}, \lambda_i, \tau_i\}$ .

165 *Why distinguish hard HOIs and non-linear density dependence (soft HOIs)?*

166 Hard HOIs and soft HOIs have different interpretations and these differences are  
167 important to recognize if we are to advance our understanding of competition in  
168 multispecies communities. The question of whether population growth rate declines with  
169 competitor density, and whether this decline is linear or non-linear is a longstanding issue  
170 in ecology (Hassell and Comins 1976). It would be confusing at best to define HOIs as  
171 any non-linear decrease in performance with density—essentially renaming the issue of  
172 non-linear density dependence.

173 More importantly, hard HOIs and non-linear density dependence are ecologically  
174 distinct as well. Hard HOIs indicate a qualitative change in the way competitors affect a  
175 focal species when other competitor species are present. Non-linear density dependence,  
176 soft HOIs, does not have the same interpretation. For instance, the net outcome of  
177 competition over discrete time intervals may be non-linear when the interaction between  
178 competitors is linear in continuous time—the discrete time Hassel model, which is non-  
179 linear, is derived from a LV competition model, which is linear in continuous time  
180 (Hassell and Comins 1976, O’Dwyer 2018). In the case of the discrete time model, the  
181 lifetime competitive effect of each individual declines with competitor density because  
182 each individual competitor is smaller and thus has less of an effect on the focal species.  
183 Thus, the non-linearity in the model arguably reflects a quantitative not a qualitative

184 change in the nature of competition when more than one species is present. In models  
185 with hard HOIs, the qualitative, or functional change in the nature of competition is  
186 defined mathematically by the introduction of additional parameters in  $\Theta$  that are not  
187 present in  $\Phi$  as defined above.

188 Adler and Morris (1994) provide another specific example where it is ecologically  
189 meaningful to differentiate between HOIs and non-linear density dependence. They  
190 describe a hypothetical scenario in which different species of plants compete for light and  
191 each species simply blocks a proportion of the light that passes through its canopy—thus  
192 taller species reduce the amount of light received by shorter species. In this way, the  
193 *qualitative* nature of the interaction between a tall species and a shorter one is  
194 independent of all other species. Nevertheless, this mechanism of interaction means that  
195 the effect of a taller species on a shorter species below it depends non-additively on the  
196 density of other competitors with a canopy between the two. Per capita competition is  
197 non-additive, but arguably there is no ecologically distinct interaction modification  
198 between the different competitors—they simply reduce the fraction of light received  
199 regardless of the presence of other species. By contrast, hard HOIs as we define them  
200 introduce new parameters, or new functional dependencies, between competitors that  
201 only kick in when more than one competitor is present.

202 Our definition also helps resolve the question of whether single species effects  
203 can involve HOIs. For instance, recent papers by Letten and Stouffer (2019) and  
204 Mayfield and Letten (2017) define HOIs as any higher order terms of competitor density,  
205 including single species quadratic terms,  $\beta_{i(jj)}N_j^2$ . Our definition, does not count these as

206 HOIs, and this agrees with the emphasis in the literature that HOIs are a phenomenon that  
207 arises between two or more *different species* of competitor (Hairston et al. 1968,  
208 Vandermeer 1969, Neill 1974, Morin et al. 1988). As per our definition, the coefficients  
209 for these terms,  $\beta_{i(jj)}$ , are parameters in a pairwise model,  $f_{ij}(n_j)$ , and thus are not hard  
210 HOIs. Nor can single species higher order *terms* (not to be confused with higher order  
211 *interactions*) generally be interpreted as examples of *intraspecific* interaction  
212 modification, i.e. the effect of each additional individual being modified by other  
213 individuals of the same species (Mayfield and Stouffer 2017). This interpretation only  
214 makes sense in the context of a model where density dependence is strictly linear. In non-  
215 linear models, such as those fit in Mayfield and Stouffer (2017), higher order terms added  
216 to the model cannot be interpreted as individual-level interaction modifications; rather  
217 these additional terms simply allow an already non-linear function to more closely  
218 approximate the observed relationship between density and performance.

219 Another definition for HOIs that is largely equivalent to ours is provided by Adler  
220 and Morris (1994). Like our definition, Adler and Morris distinguished between HOIs  
221 and non-linear density dependence, and their definition agrees with ours in most cases.  
222 However, there are some cases with three or more competitor species where the Adler  
223 and Morris approach would indicate an HOI and our definition would not. We believe  
224 our definition is more general, it does not depend on the number of competitor species  
225 present and it can be more directly related to the traditional verbal definitions that  
226 ecologists have used when discussing HOIs.

227 In the remainder of this paper we outline the experimental set-up and statistical  
228 analyses required to test for HOIs in empirical data. Because real world data that would  
229 allow for rigorous tests of HOIs are limited, we use a mechanistic growth model to  
230 simulate a virtual competition experiment among three annual plant species (Figure 3).  
231 We then fit species' responses to interspecific competition using phenomenological  
232 competition models with and without HOIs and evaluate which species' responses are  
233 best fit by competition model with HOIs. By considering when HOIs emerge in this  
234 simple simulation we show the steps required to detect HOIs in empirical data and shed  
235 light on the processes that could generate HOIs in nature.

### 236 **Simulating a Higher Order Competition Experiment**

237 A rigorous demonstration of HOIs requires measuring how focal species'  
238 performance changes in response to increasing densities of each competitor species in  
239 isolation, as well as to varying densities of combinations of different competitor species.  
240 This requires an orthogonal response surface design where each competitor's density is  
241 varied independently of each other species.

242 Instead of analyzing real data, we used a mechanistic growth model to simulate a  
243 virtual experiment in which individuals of each annual plant species are grown in  
244 separate plots with a range of competitor densities (Figure 2). The simulation lasts one  
245 growing season (200 days). After the simulation ends, we find the per capita seed output  
246 of each focal individual and record this as a measure of performance. We quantified  
247 performance in plots with densities of 0, 1, 2, 3, 4, 9, 16, 25 or 36 individuals of each

248 other competitor species, including intraspecific competition. We also measured  
249 performance when the focal species was grown against all possible combinations of two  
250 competitor species at the same densities. This design allows us to fit non-linear functions  
251 to the interaction between each pair of species and test for any HOIs when more than two  
252 competitors are present together.

253 We developed a mechanistic growth and resource competition model intended to  
254 simulate the growth of annual plants in a Mediterranean climate (Figure S 1). The  
255 simulated individuals germinate in the winter and then grow, flower, and produce seeds  
256 by the early summer (Godoy and Levine 2014). In our model, we track a single pool of  
257 soil resources, most easily thought of as water or water-soluble nutrients. This pool is not  
258 resupplied during the season and is depleted over time. As the resource concentration  
259 declines, plant growth slows and eventually stops (Figure 3). We make the assumption  
260 that when individual net growth is zero, the plant will convert a fraction of its biomass  
261 into seeds that remain dormant until the start of the next growing season (Cohen 1976).  
262 Assuming all seeds germinate at the same time, and no seed mortality, we can use the per  
263 capita seed production as a direct measure of population growth rate in each competition  
264 treatment.

265 Resource dynamics in the model are given by the differential equation,

$$\frac{dR}{du} = I - \sum_{i=1}^m n_i g_i(b_i) h(R(u)), \quad (6)$$

266 where  $R(u)$  is the resource availability at time  $u$  ( $u$  being day within the growing  
267 season),  $I$  is the resource supply rate, and the final term is the sum of resource uptake

268 rates of all  $m$  species in the community. Biomass per individual of each species  $i$  at time  
269  $u$  is given by  $b_i$  and the number of individuals in the population is given by  $n_i$ . The  
270 function  $g_i(b_i)$  converts per capita biomass into surface area of fine roots. Total resource  
271 uptake rate is the product of root surface area and the rate of resource conductance per  
272 unit root surface area. The rate of resource conductance into the roots is a function,  $h(R)$ ,  
273 of soil resource concentration, which we specify below. We simulate a Mediterranean  
274 climate by setting initial resource availability high,  $R(u = 0) \gg 0$ , and setting the  
275 resource supply rate,  $I$ , to zero.

276 Growth of each species is given by a piecewise differential equation,

$$\frac{dB_i}{du} = \begin{cases} n_i g_i(b_i) h(R) q - \delta_i B_i, & n_i g_i(b_i) h(R) q > \delta_i B_i \\ 0, & n_i g_i(b_i) h(R) q \leq \delta_i B_i \end{cases} \quad (7)$$

277 where,  $q$  is the rate of resource conversion into biomass and  $\delta_i$  is the rate of biomass loss  
278 and respiration. The conditions indicate that when net growth of each species is less than  
279 or equal to zero, growth and resource consumption stops (i.e. is set to zero). Biomass per  
280 individual plant,  $b_i$ , is converted into root surface area for each individual via the function  
281  $g_i(b_i) = \left(\frac{pb_i}{d_i}\right)^v$ , where  $p$  is the proportion of growth allocated to roots,  $d_i$  is root tissue  
282 density in  $\text{g cm}^{-3}$  and  $v$  is an exponent that scales root volume to root surface area (see  
283 Kooijmans (1986) for a conceptually similar approach to protists). The rate of resource  
284 uptake per unit root surface area is dependent on resource concentration following  
285 Michaelis-Menton kinetics:

$$h(R) = \frac{V_{max}R}{K + R}. \quad (8)$$

286 The equations above describe growth in total population biomass,  $B_i$ , over the  
287 course of days within a single growing season. In contrast, a population-level  
288 phenomenological competition model would track the total population density,  $n_i$ , over  
289 annual time steps,  $t$ . In order to convert population density into biomass, we assume that  
290 individuals start the growing season as seeds with a fixed size. Thus, the initial biomass  
291 is  $B_i(0) = \mu n_i(t)$ , where  $\mu$  is mass per seed and  $n_i(t)$  is the number of seeds in the  
292 population in year  $t$ . The population density in the following year  $n_i(t + 1)$  is the total  
293 number of seeds produced by the mature plants at the end of the growing season,

$$n_i(t + 1) = \frac{c}{\mu} (\max B_i), \quad (9)$$

294 where  $\max B_i$  is the final accumulated biomass of species  $i$  and  $c$  gives the proportion of  
295 total biomass converted to seeds.

296 We simulate the dynamics of three virtual annual plant species that differ in their  
297 allocation to roots and in their rates of resource uptake (Table S 1). This difference leads  
298 to phenology differences, i.e. some species stop growing earlier than others (Figure 3).  
299 Phenology differences emerge because of the assumed trade-off between species rank in  
300 terms of root density  $d_i$  and rank in terms of tissue respiration and loss rate,  $\delta_i$ , (Tjoelker  
301 et al. 2005, Birouste et al. 2014) (Table S1). Species with lower root density convert each  
302 gram of biomass into more root surface area and this allows them to grow faster early in  
303 the season when resource concentrations are high. In contrast, species with denser roots  
304 but lower rates of tissue loss and respiration grow more slowly but continue growing later  
305 into the season as resource availability declines. Thus, we refer to the three species in our



306 simulations as ‘early’, ‘mid’ and ‘late’, depending on when they stop growing during the  
307 simulation (Figure 3).

308 We chose parameters that produced growth and phenology patterns qualitatively  
309 similar to biomass accumulation curves observed in annual plant communities (Godoy  
310 and Levine 2014). A table of parameter values for the simulations are provided in the  
311 supporting information (Table S 1). We simulated growth and resource dynamics by  
312 solving equations (6) and (7) with the package `desolve` in the statistical program R (R  
313 Core Team 2015). Code to reproduce analyses is available in a zip file and on github:  
314 [https://github.com/akleinhesselink/Competitive\\_HOI/releases/tag/1.0](https://github.com/akleinhesselink/Competitive_HOI/releases/tag/1.0)

### 315 *Phenomenological annual plant model*

316 In order to investigate whether this simulation produces HOIs between the  
317 competitors, we fit non-linear phenomenological competition models to the per capita  
318 seed production of each species. After evaluating a number of non-linear models, we  
319 found that the Hassel model (Eq. [5]) fit the outcome of simulated pairwise competition  
320 well. We specified an HOI version of the Hassel model as follows,

$$\frac{n_i(t+1)}{n_i(t)} = \frac{\lambda_i}{\left(1 + \sum_{j=1}^3 \alpha_{ij} n_j + \sum_{j=1}^3 \sum_{k=j+1}^3 \beta_{i(jk)} n_j n_k\right)^{\tau_i}}, \quad (10)$$

321 where all HOI effects of two competitor species on the focal species  $i$  are fitted with the  
322 coefficients  $\beta_{i(jk)}$  (following the notation in Mayfield and Stouffer (2017)). By our  
323 definition,  $\beta_{i(jk)}$  is a hard HOI when  $j \neq k$ .

324 Finally, we also considered a pairwise multiplicative version of the Hassel form,

$$\frac{n_i(t+1)}{n_i(t)} = \frac{\lambda_i}{\left(\prod_{j=1}^3 (1 + \alpha_{ij}n_j)\right)^{\tau_i}}. \quad (11)$$

325 This model does not have HOIs per our definition—all  $\alpha_{ij}$  and  $\tau_i$  parameters can be  
326 estimated from the pairwise cases where the focal species  $i$  competes with each other  
327 species  $j$  in isolation. However, when there are two or more competitors the denominator  
328 becomes a polynomial with multiplicative terms of competitor density. In the case of only  
329 one competitor species, it collapses to the same pairwise Hassel model. Thus, contrasting  
330 this model with the HOI model allows us to test whether hard HOIs are required as  
331 opposed to a simpler non-linear function without HOIs.

332 We first fit the Hassel model to the pairwise cases and checked the model fit  
333 graphically. We then fit the Hassel models (Eq. [5]), the HOI model (Eq. [10]) and the  
334 multiplicative pairwise model (Eq. [11]) to the full set of two competitor densities. For  
335 each focal species and model, we calculated root mean squared error (RMSE) as a  
336 measure of goodness of fit and evaluated the strength and direction of HOIs by  
337 examining the HOI coefficients,  $\beta_{i(jk)}$ . We fit all models with the non-linear least squares  
338 modelling function, `nls`, in R. Code to run the simulations, fit the models and produce  
339 the figures is given in the online supporting information.

## 340 **Results**

341 For all three species we found the Hassel model fit the simulated pairwise data  
342 accurately (Figure 4). Next, we compared the three models fit to the full range of  
343 competitor densities (Figure 5). For the early season species, the Hassel model with and  
344 without the HOI showed more or less equivalent fits to the data with only a slight

345 decrease in RMSE for the HOI model (Figure 5A&G). For the mid-season and late-  
346 season species, we found that the HOI model fit the data better than the pairwise Hassel  
347 model (Figure 5 B-I). The inability of the pairwise Hassel model to fit the per capita seed  
348 output of the mid and late-season species can be seen by plotting the observed and per  
349 capita seed production against two competitor densities at once (Figure S 2). In all cases,  
350 the fitted HOI coefficients,  $\beta_{i(jk)}$ , were of smaller magnitude than the fitted pairwise  
351 effects,  $\alpha_{ij}$  (Figure 6). The fitted HOIs were stronger for the mid and late season species  
352 than for the early season species (Figure 6). The multiplicative model (Eq. [11]) fit the  
353 multi-competitor dynamics poorly when compared to the pairwise model and the HOI  
354 model (Figure 5).

## 355 **Discussion**

### 356 *Evidence for higher order interactions*

357 Our simulation shows clear evidence for HOIs affecting two of the three virtual  
358 species in our simulations (Figure 6). For the mid and late season species, the functional  
359 form of per capita competition changed depending on the presence of other interspecific  
360 competitors. Specifically, the presence of early or mid-season competitors increased the  
361 per capita effects of competition on the late-season species (Figure 6F). Likewise, the  
362 presence of the early season species increased the per capita effects of competition on the  
363 mid-season species (Figure 6E). For the early season species, no clear HOIs were  
364 detected: the pairwise interaction Hassel model fit the data nearly as well as the HOI

365 model (Figure 5A&G) and the magnitudes of the HOI coefficients were small (Figure  
366 6D).

367 We observe competition in our simulations because of a feedback between  
368 individual density and resource concentration. As individuals grow, they draw down  
369 resource concentrations (Figure S 1), this decreases the rate of resource acquisition into  
370 the roots by equation (8) and slows the growth of other individuals in the community.  
371 The magnitudes of pairwise interactions between species is easily understood from this  
372 perspective. For instance, the late season species has a weak per capita effect on the early  
373 season species because while the early species is active, roughly day 0 to day 30, the late-  
374 season species remains small and has a slow absolute rate of resource uptake (Figure  
375 3A—blue line ). In contrast, the mid-season species has a stronger effect on the early  
376 season species because it grows faster during the same period (Figure 3—red line). On  
377 the other hand, the early season species has a weak effect on the late season species  
378 because the former stops growing before the latter does the majority of its growth (Figure  
379 3—black line).

380 The simplicity of the simulation makes it possible to understand how HOIs  
381 emerge as well. The HOIs that affect the mid and late season species are in part due to an  
382 indirect effect of resource uptake on competitor size and in part due to changes in  
383 competitor phenology. For instance, in a scenario with one individual of each species the  
384 early season species slows the growth of both the mid and the late-season species, this  
385 keeps them smaller later into the season and makes them both more sensitive to  
386 competition as the season progresses (Figure 3). This is reflected in the HOI coefficients

387 that magnify competition for the mid and late-season species (Figure 6E&F). In contrast,  
388 the early season species grows fast and exerts the dominant effect on the resource while it  
389 is active, this makes it relatively insensitive to changes in the size of its interspecific  
390 competitors (Figure 6D).

391 While the HOIs in this system are similar to competition mediated indirect effects  
392 (Levine et al. 2017) there are two important differences between the HOIs we observed  
393 and traditional indirect effects. First, indirect effects are not emergent properties of a  
394 multi-competitor system, rather they are a predictable result of pairwise per capita  
395 competition coefficients (Kleinhesselink and Adler 2015). Second, indirect effects can  
396 generally be understood as emerging because of changes in the density of competitors  
397 over time, not because of changes in per capita competition. For example, one species  
398 may have an indirect effect on its competitor by changing the density of a second  
399 competitor over the course of several year. In contrast, the HOIs in our simulation emerge  
400 over the course of a single growing season with fixed population densities. Thus, these  
401 HOIs indicate ecologically meaningful changes in the per capita effect of one species on  
402 another.

403 Our example can be contrasted with a recent simulation of forest dynamics that  
404 demonstrated how HOIs could affect species coexistence (Grilli et al. 2017). In that  
405 simulation, unlike ours, per capita interactions between species were fixed. What the  
406 authors called HOIs in that model, were not due to changes in the per capita effect of  
407 competition, but were caused by changes in competitor density over time that were not  
408 explicitly tracked by the model.

409 *The phenomenological nature of HOIs*

410 HOIs can only be defined and quantified within the context of phenomenological  
411 models of competition. Phenomenological models simplify community dynamics by  
412 tracking population densities and not the resources for which species compete (Chesson  
413 2000). HOIs emerge in phenomenological models precisely because they leave out  
414 mechanistic detail and do not explicitly model resource dynamics (Abrams 1983,  
415 O’Dwyer 2018, Letten and Stouffer 2019). Given this, one may be tempted to conclude  
416 that HOIs are an artifact of the inadequacy of such models. However, any concept of  
417 species *interactions* (at least competitive interactions) is essentially phenomenological in  
418 nature—biomass and nutrients do not flow directly between competing individuals, rather  
419 competitors influence each other’s growth or survival indirectly through changes in the  
420 abundance of shared resources. Thus one could sidestep the problem of HOIs by instead  
421 modeling communities mechanistically as biomass and resources (e.g. Dybzinski and  
422 Tilman (2007)). However, doing may require re-thinking ecological theory formulated on  
423 the concept of species *interactions*.

424 Phenomenological competition coefficients can sometimes be derived analytically  
425 from mechanistic competition models by making the assumption that resource  
426 concentrations are near a fixed equilibrium (Tilman 1977, Meszéna et al. 2006,  
427 Kleinhesselink and Adler 2015, Letten et al. 2017). However, in many natural systems,  
428 such as such as those involving annual plants, resource concentrations and individual size  
429 fluctuate rapidly over the course of a single growing season or generation. This makes  
430 deriving competition coefficients directly from the resource dynamics more difficult,

431 perhaps impossible (O'Dwyer 2018). Thus, even in cases in which we actually know  
432 which resources species compete for, fitting a phenomenological model to population  
433 dynamics may be the only way to quantitatively describe species interactions. Our work  
434 clarifies the what it means to fit models with and without HOIs to multi-competitor  
435 settings.

436 *Are HOIs widespread?*

437 In our virtual experiment, HOIs arise because individual size and phenology, the  
438 traits that determine each species' impact on and sensitivity to resource availability, are  
439 themselves governed by resource availability. More generally, changes in individual size  
440 and corresponding changes in resource uptake rate may be a common cause of HOIs in  
441 nature. We predict that HOIs will likely be common in systems in which 1) consumers  
442 cause large resource fluctuations, 2) the per capita rate of resource uptake changes in  
443 response to resource availability, and 3) the strength of this response varies across  
444 species. Instead of changes in individual size, another mechanism that could generate  
445 HOIs would be density-dependent changes in resource acquisition traits. For example,  
446 traits such as height, specific leaf area, and phenology, have been shown to change in  
447 response to competition or resource availability (e.g. Aronson et al. 1992, Bennett et al.  
448 2016, Conti et al. 2018). If per capita competition coefficients are a function of these  
449 traits, then it would not be surprising if changes in these traits led to HOIs. If changes in  
450 individual size within a season, or trait plasticity are common, and are also likely to cause  
451 HOIs, this begs the question of why there have been so few documented examples of  
452 HOIs in natural communities (but see Mayfield and Stouffer 2017).

453           One hypothesis is that HOIs are common but usually too weak to detect. A key  
454 factor in producing HOIs in our simulation is that each species has a uniquely shaped  
455 growth curve and phenology. In additional simulations, we found that as species became  
456 more similar in their traits HOIs became weaker (Appendix A). In nature, such large  
457 functional differences in the way species take-up resources over time may be rare. At the  
458 same time, these simulations suggest that quantifying how functional traits change in  
459 response to competitors provides a likely path to further understanding of HOIs.

460           A second factor generating the HOIs in our simulation are the rapid changes in  
461 resource availability and average plant size, and consequently, species interactions, over  
462 the course of a season (Figure 3). Without these dynamics, species might have relatively  
463 constant per capita effects on one another and no HOIs would emerge. For instance,  
464 compare our system to an idealized version of resource competition for perennial plants  
465 (Dybzinski and Tilman 2007). Due to their large size perennial plants can be assumed to  
466 quickly draw resources down to a dynamic equilibrium. By contrast, seasonally forced  
467 systems such as annual plant communities in Mediterranean climates may be a good  
468 place to look for strong HOIs (Mayfield and Stouffer 2017).

## 469 **Conclusion**

470           HOIs have profound implications for how we understand and model multispecies  
471 communities. However, before ecologists can embark on measuring HOIs in nature, they  
472 must have a shared definition for what HOIs are. We have provided a more general  
473 definition of HOIs caused by interaction modifications that will be useful as ecologists



474 seek empirical evidence for HOIs in nature. By simulating growth and resource  
475 competition in a virtual experiment, we outline the steps required to fit pairwise and HOI  
476 models to field data. This simulation also sheds light on the environmental conditions and  
477 life-history traits that may be more likely to generate HOIs. While we believe that HOIs  
478 should be common in nature this does not mean that they will be strong enough to detect  
479 statistically. Our work suggests that environments in which resource availability and  
480 competitor size change rapidly during a single growing season may be a likely place for  
481 detectable HOIs to emerge.

## 482 **Acknowledgments**

483 We wish to thank Joanna Shih for providing the botanical line drawings. Gaurav  
484 Kandlikar, Theo Gibbs, Chris Klausmeier, two anonymous reviewers and members of the  
485 Kraft and Levine lab provided valuable comments on earlier drafts of this manuscript.

486 **References**

- 487 Abrams, P. A. 1983. Arguments in Favor of Higher Order Interactions. *The American*  
488 *Naturalist* 121:887–891.
- 489 Adler, F. R., and W. F. Morris. 1994. A General Test for Interaction Modification.  
490 *Ecology* 75:1552–1559.
- 491 Aronson, J., J. Kigel, A. Shmida, and J. Klein. 1992. Adaptive phenology of desert and  
492 Mediterranean populations of annual plants grown with and without water stress.  
493 *Oecologia* 89:17–26.
- 494 Bard, Y. 1974. Nonlinear parameter estimation. Academic Press, New York, NY.
- 495 Bennett, J. A., K. Riibak, R. Tamme, R. J. Lewis, and M. Pärtel. 2016. The reciprocal  
496 relationship between competition and intraspecific trait variation. *Journal of*  
497 *Ecology* 104:1410–1420.
- 498 Billick, I., and T. J. Case. 1994. Higher Order Interactions in Ecological Communities:  
499 What Are They and How Can They be Detected? *Ecology* 75:1530–1543.
- 500 Birouste, M., E. Zamora-Ledezma, C. Bossard, I. M. Pérez-Ramos, and C. Roumet. 2014.  
501 Measurement of fine root tissue density: a comparison of three methods reveals  
502 the potential of root dry matter content. *Plant and Soil* 374:299–313.
- 503 Case, T. J., and E. A. Bender. 1981. Testing for Higher Order Interactions. *The American*  
504 *Naturalist* 118:920–929.
- 505 Chesson, P. 2000. Mechanisms of Maintenance of Species Diversity. *Annual Review of*  
506 *Ecology and Systematics* 31:343–366.

- 507 Cohen, D. 1976. The Optimal Timing of Reproduction. *The American Naturalist*  
508 110:801–807.
- 509 Conti, L., S. Block, M. Parepa, T. Münkemüller, W. Thuiller, A. T. R. Acosta, M. van  
510 Kleunen, S. Dullinger, F. Essl, I. Dullinger, D. Moser, G. Klöner, O. Bossdorf,  
511 and M. Carboni. 2018. Functional trait differences and trait plasticity mediate  
512 biotic resistance to potential plant invaders. *Journal of Ecology* 106:1607–1620.
- 513 Dybzinski, R., and D. Tilman. 2007. Resource Use Patterns Predict Long-Term  
514 Outcomes of Plant Competition for Nutrients and Light. *The American Naturalist*  
515 170:305–318.
- 516 Godoy, O., and J. M. Levine. 2014. Phenology effects on invasion success: insights from  
517 coupling field experiments to coexistence theory. *Ecology* 95:726–736.
- 518 Grilli, J., G. Barabás, M. J. Michalska-Smith, and S. Allesina. 2017. Higher-order  
519 interactions stabilize dynamics in competitive network models. *Nature* 548:210–  
520 213.
- 521 Hairston, N. G., J. D. Allan, R. K. Colwell, D. J. Futuyma, J. Howell, M. D. Lubin, J.  
522 Mathias, and J. H. Vandermeer. 1968. The Relationship between Species  
523 Diversity and Stability: An Experimental Approach with Protozoa and Bacteria.  
524 *Ecology* 49:1091–1101.
- 525 Hassell, M. P., and H. N. Comins. 1976. Discrete time models for two-species  
526 competition. *Theoretical Population Biology* 9:202–221.
- 527 Kleinhesselink, A. R., and P. B. Adler. 2015. Indirect effects of environmental change in  
528 resource competition models. *The American Naturalist* 186:766–776.

- 529 Kooijman, S. A. L. M. 1986. Energy budgets can explain body size relations. *Journal of*  
530 *Theoretical Biology* 121:269–282.
- 531 Letten, A. D., P.-J. Ke, and T. Fukami. 2017. Linking modern coexistence theory and  
532 contemporary niche theory. *Ecological Monographs* 87:161–177.
- 533 Letten, A. D., and D. B. Stouffer. 2019. The mechanistic basis for higher-order  
534 interactions and non-additivity in competitive communities. *Ecology Letters*  
535 22:423–436.
- 536 Levine, J. M., J. Bascompte, P. B. Adler, and S. Allesina. 2017. Beyond pairwise  
537 mechanisms of species coexistence in complex communities. *Nature* 546:56–64.
- 538 Mayfield, M. M., and D. B. Stouffer. 2017. Higher-order interactions capture  
539 unexplained complexity in diverse communities. *Nature Ecology & Evolution*  
540 1:0062.
- 541 Meszéna, G., M. Gyllenberg, L. Pásztor, and J. A. J. Metz. 2006. Competitive exclusion  
542 and limiting similarity: A unified theory. *Theoretical Population Biology* 69:68–  
543 87.
- 544 Morin, P. J., S. P. Lawler, and E. A. Johnson. 1988. Competition Between Aquatic  
545 Insects and Vertebrates: Interaction Strength and Higher Order Interactions.  
546 *Ecology* 69:1401–1409.
- 547 Neill, W. E. 1974. The Community Matrix and Interdependence of the Competition  
548 Coefficients. *The American Naturalist* 108:399–408.
- 549 O’Dwyer, J. P. 2018. Whence Lotka-Volterra?: Conservation laws and integrable systems  
550 in ecology. *Theoretical Ecology*.

- 551 Pomerantz, M. J. 1981. Do “Higher Order Interactions” in Competition Systems Really  
552 Exist? *The American Naturalist* 117:583–591.
- 553 R Core Team. 2015. R: A Language and Environment for Statistical Computing. R  
554 Foundation for Statistical Computing, Vienna, Austria.
- 555 Tilman, D. 1977. Resource Competition between Plankton Algae: An Experimental and  
556 Theoretical Approach. *Ecology* 58:338–348.
- 557 Tjoelker, M. G., J. M. Craine, D. Wedin, P. B. Reich, and D. Tilman. 2005. Linking leaf  
558 and root trait syndromes among 39 grassland and savannah species. *New*  
559 *Phytologist* 167:493–508.
- 560 Vandermeer, J. H. 1969. The Competitive Structure of Communities: An Experimental  
561 Approach with Protozoa. *Ecology* 50:362–371.
- 562

563 **Figures**

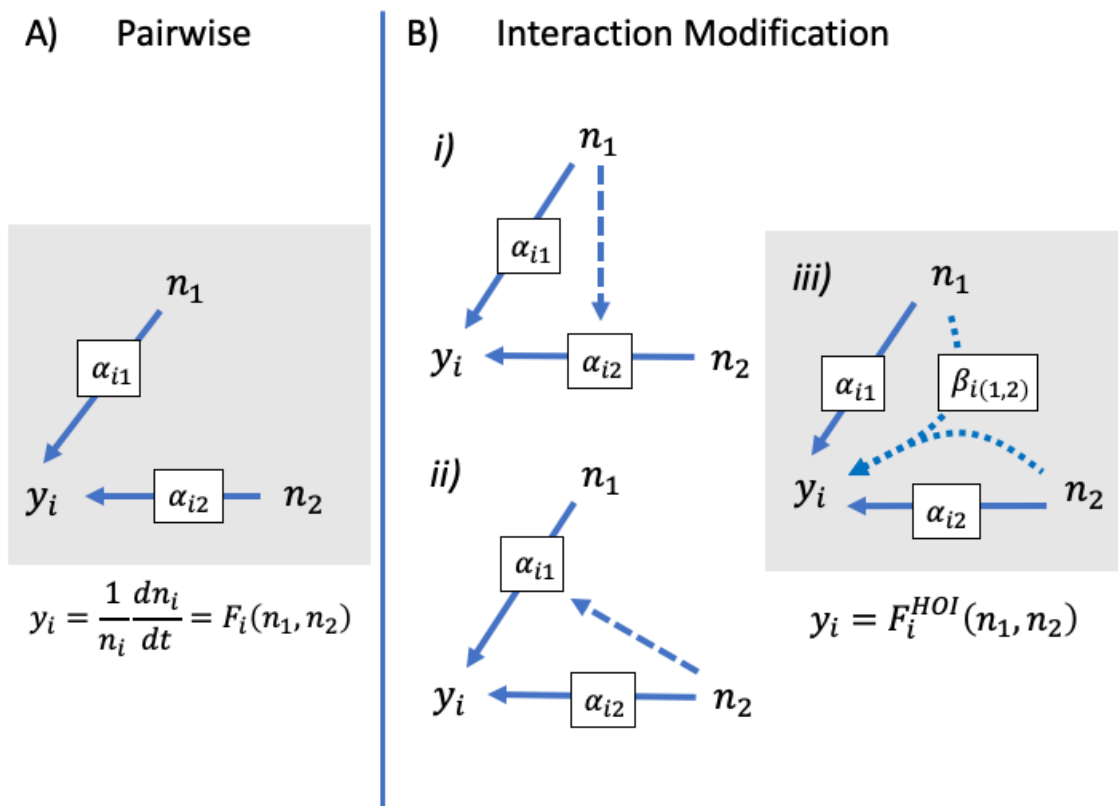

564

565 **Figure 1. How interaction modifications lead to higher order interactions. In A, a**  
 566 **pairwise model is shown without interaction modification. The competitive effect of**  
 567 **species one and two on the per capita growth of the focal species  $i$ , are shown as**  
 568 **separate blue arrows. These effects may be simple per competition coefficients,  $\alpha_{12}$**   
 569 **and  $\alpha_{13}$ , or could be more complicated non-linear functions of density. In B, a**  
 570 **model with interaction modification is shown: in *i*) the dashed arrow shows that the**  
 571 **effect of two is modified by the density of one; in *ii*) the effect of one is modified by**  
 572 **the density of two. In reality, one cannot assign either species as the modifier, rather**

573 **they modify each other's effects in a way that emerges a single HOI. The HOI in**  
574 **this case is quantified by introducing the new parameter  $\beta_{i(1,2)}$ , and shown with the**  
575 **curved arrows in *iii*.**

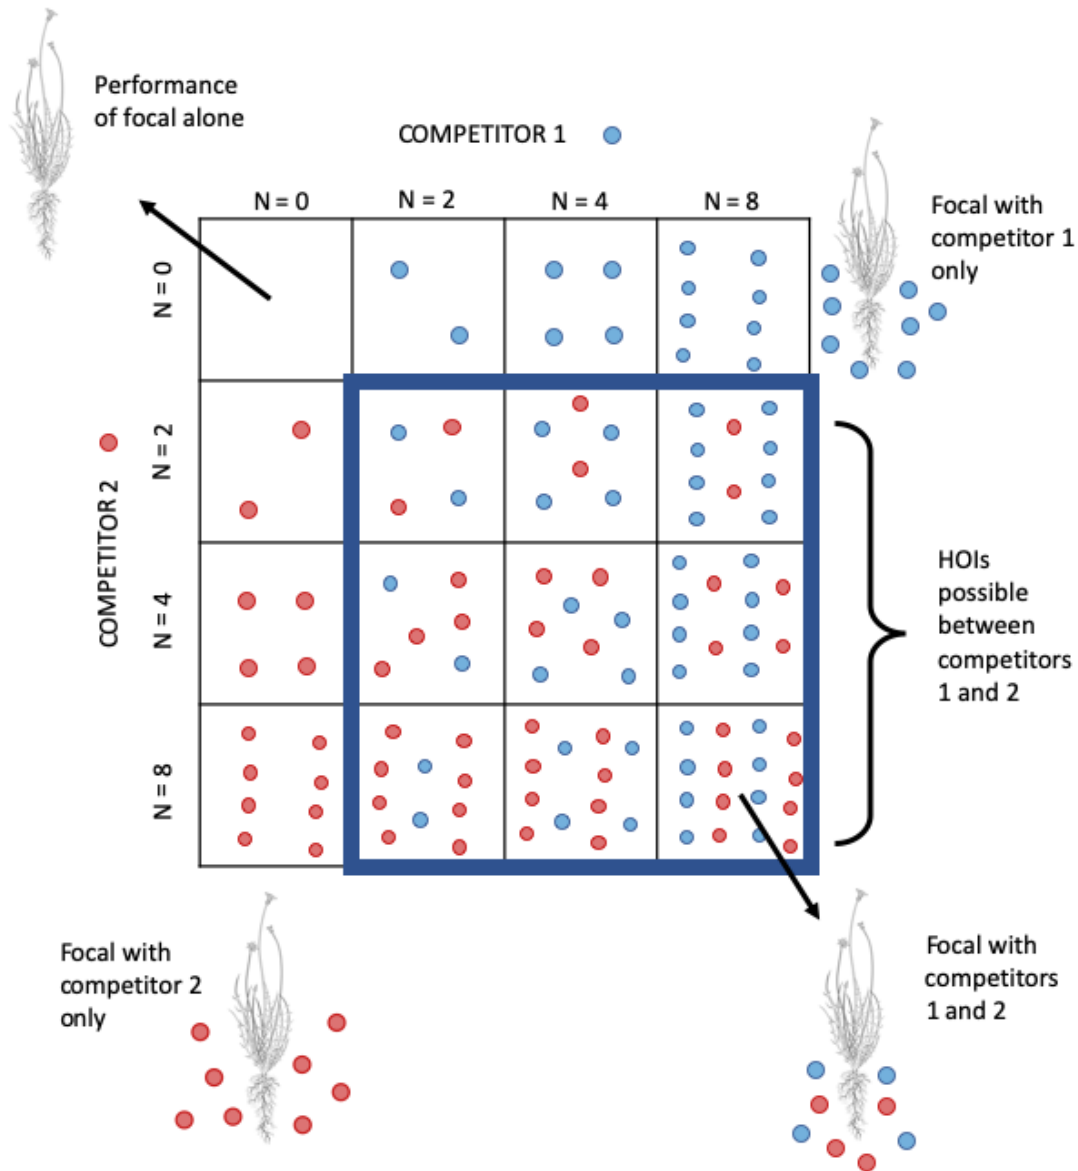

576

577 **Figure 2 Schematic of orthogonal competition experiment required to detect higher**  
578 **order interactions. Each square represents a separate study plot. Competitor 1, (blue**  
579 **circles) and Competitor 2 (red circles) are grown in a gradient of increasing density**  
580 **alone and together. A single individual of the focal species (line drawing) is grown in**



581 **each plot allowing the response to competition from each competitor species to be**  
582 **fitted.**

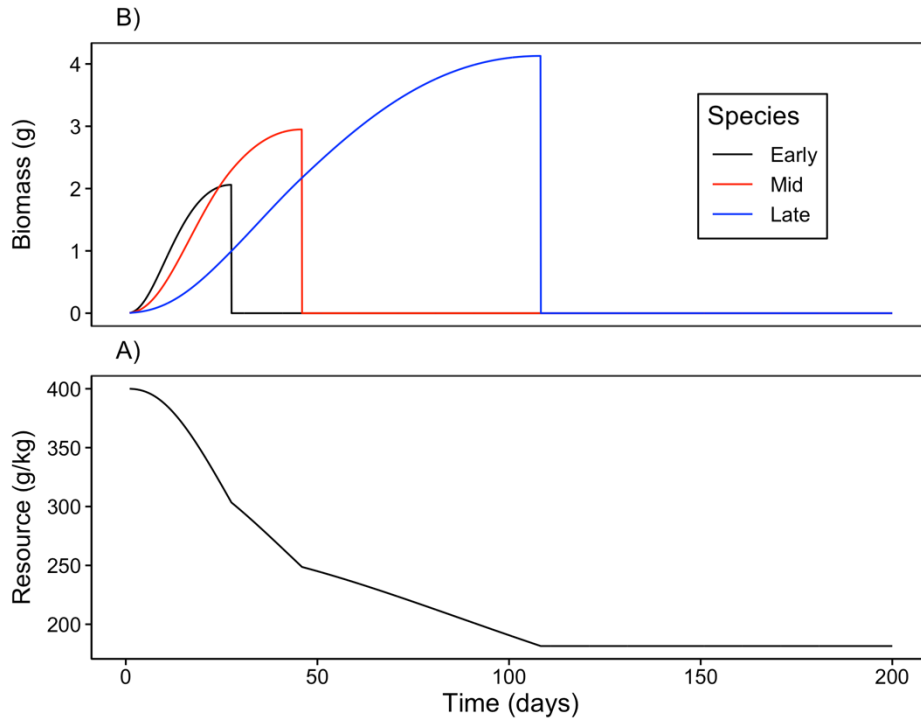

583

584 **Figure 3. Example time course of A) annual plant growth and B) resource**  
585 **concentration during a single simulated growing season. In this example, each**  
586 **species' population consists of a single individual. The early season species (black)**  
587 **grows rapidly when resource availability is high and senesces early. By contrast, the**  
588 **late season species (blue) grows more slowly but grows later into the season as**  
589 **resource availability declines. The growth curve for the mid-season species (red) lies**  
590 **between these extremes.**

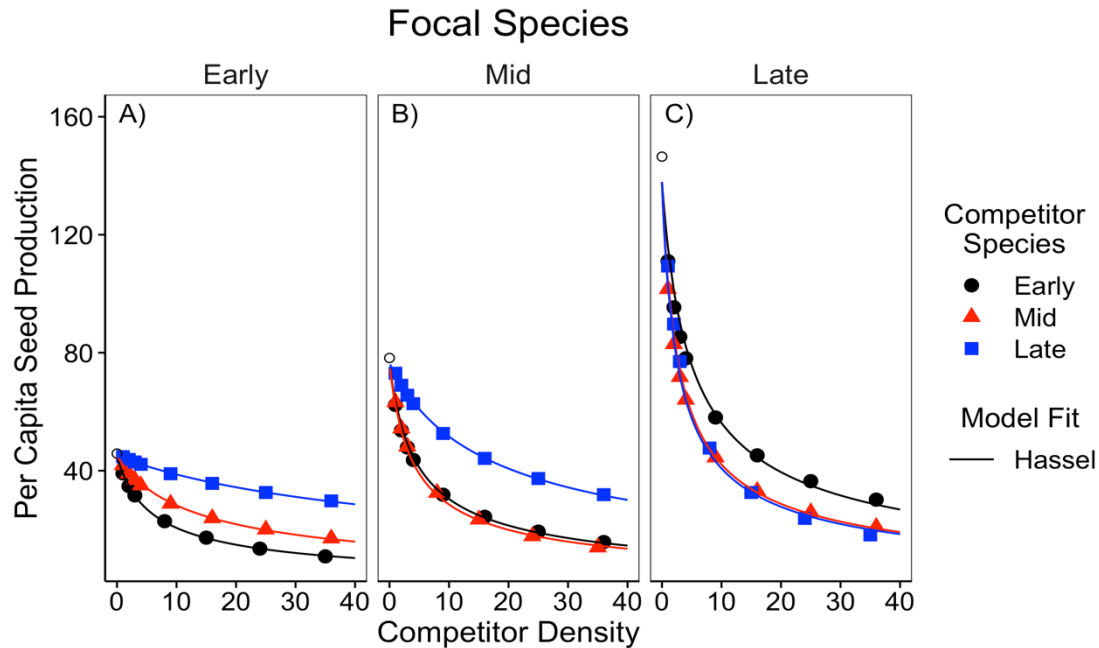

591

592 **Figure 4. Simulated per capita seed production of the A) early, B) middle and C)**  
593 **late season species in response to a single competitor species at a time. Competitor**  
594 **density is shown on the x-axis. Colors and shapes indicate the identity of the**  
595 **competitor species. Open circles show the per capita seed production of each focal**  
596 **species in the absence of any competitors. The solid line shows the fit of the Hassel**  
597 **model.**

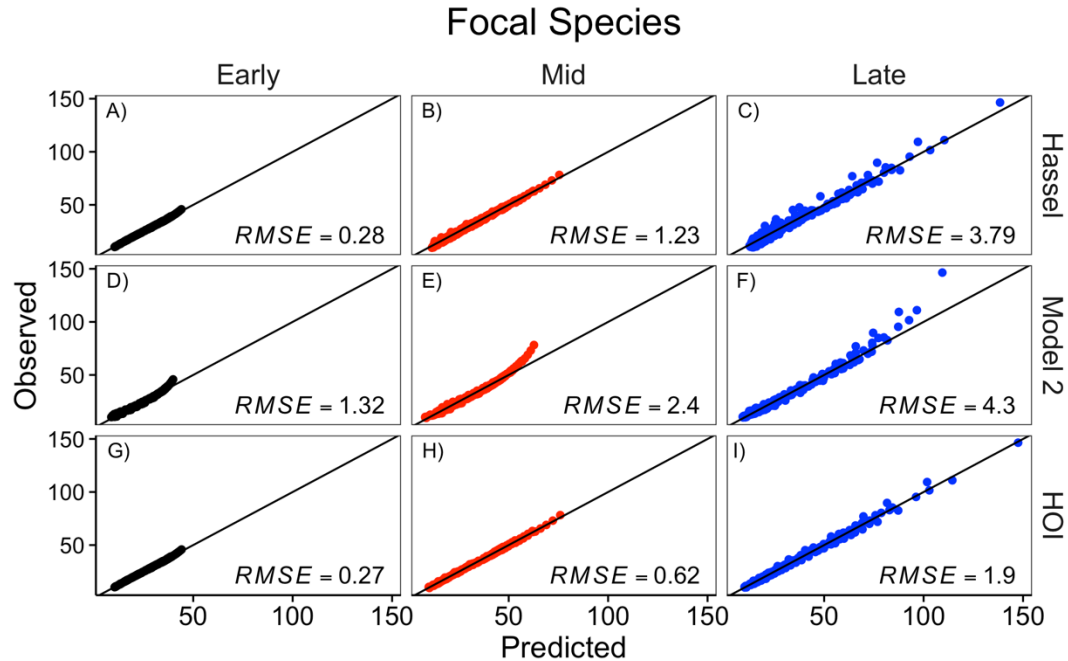

598

599 **Figure 5. Comparison of the Hassel, multiplicative (‘model 2’), and HOI models fit**  
600 **to each focal species. The y-axis shows the simulated per capita seed production of**  
601 **the focal species. The x-axis shows the per capita seed production predicted by the**  
602 **phenomenological model. The top row, A-C, shows the prediction for the pairwise**  
603 **Hassel model (eq. [5]); the middle row, D-F, shows the prediction from the**  
604 **multiplicative model (eq. [11]); and the bottom row, G-I, shows the prediction from**  
605 **the HOI model (eq. [10]). The one-to-one line and root-mean-squared error (RMSE)**  
606 **for predictions from each model are shown.**

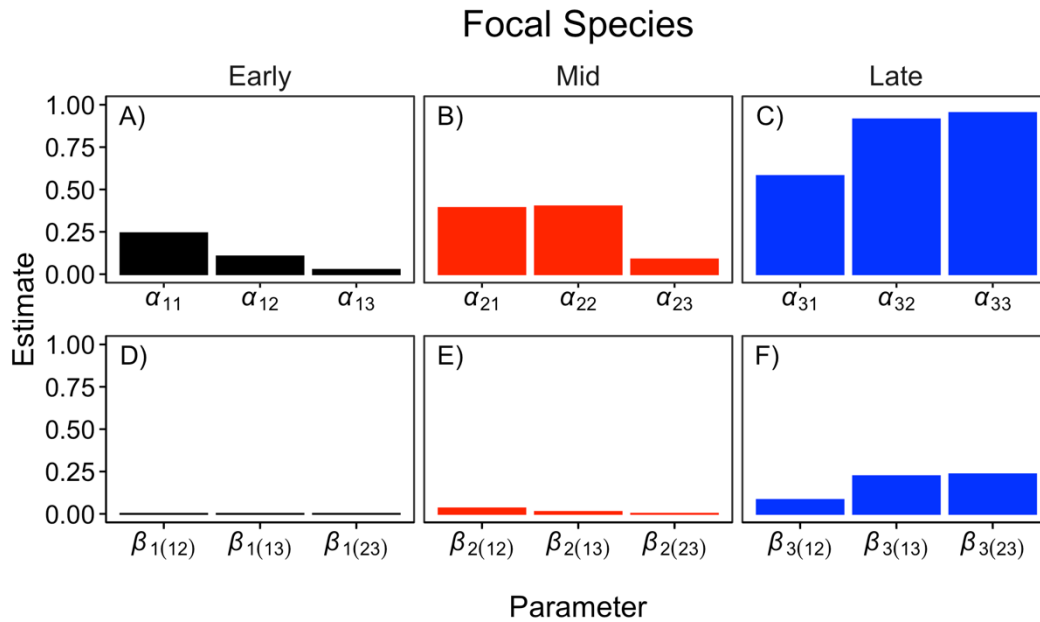

607

608 **Figure 6. Interaction coefficients for each of focal species from the HOI model. The**  
609 **top row, A-C, shows the pairwise competition coefficients for the focal species and**  
610 **each competitor. The bottom row, D-F, shows the two-species HOI coefficients.**  
611 **Coefficient subscripts indicate which focal species and competitor species are**  
612 **involved, 1 = Early, 2 = Mid, 3 = Late.**

613 **Supporting Information – Additional Tables**

614 **Table S 1 Table of parameter values used in the growth simulation experiment in**  
615 **the main text.**

| Parameter  | Value | Definition                                                                    |
|------------|-------|-------------------------------------------------------------------------------|
| $U$        | 200   | Duration of growth simulation (days)                                          |
| $I$        | 0     | Resource supply rate ( $\text{g day}^{-1}$ )                                  |
| $R(0)$     | 400   | Initial resource concentration ( $\text{g kg}^{-1}$ )                         |
| $d_1$      | 0.06  | Early competitor root density ( $\text{g cm}^{-3}$ )                          |
| $d_2$      | 0.12  | Mid competitor root density ( $\text{g cm}^{-3}$ )                            |
| $d_3$      | 0.36  | Late competitor root density ( $\text{g cm}^{-3}$ )                           |
| $\delta_1$ | 0.3   | Early competitor loss and respiration rate ( $\text{g g}^{-1}\text{d}^{-1}$ ) |
| $\delta_2$ | 0.15  | Mid competitor loss and respiration rate ( $\text{g g}^{-1}\text{d}^{-1}$ )   |
| $\delta_3$ | 0.053 | Late competitor loss and respiration rate ( $\text{g g}^{-1}\text{d}^{-1}$ )  |
| $K$        | 350   | Resource half-saturation constant ( $\text{g kg}^{-1}$ )                      |
| $V_{max}$  | 1     | Maximum resource conductance ( $\text{g d}^{-1}\text{cm}^{-2}$ )              |
| $p$        | 0.5   | Ratio of root biomass to total biomass                                        |
| $\nu$      | 0.66  | Scaling exponent (unitless)                                                   |
| $q$        | 0.2   | Biomass assimilation rate ( $\text{g g}^{-1}\text{d}^{-1}$ )                  |
| $\mu$      | 0.005 | Seed mass (g per seed)                                                        |
| $c$        | 0.1   | Conversion of final biomass to seed mass ( $\text{g g}^{-1}$ )                |

616

617

618 **Supporting Information – Additional figures**

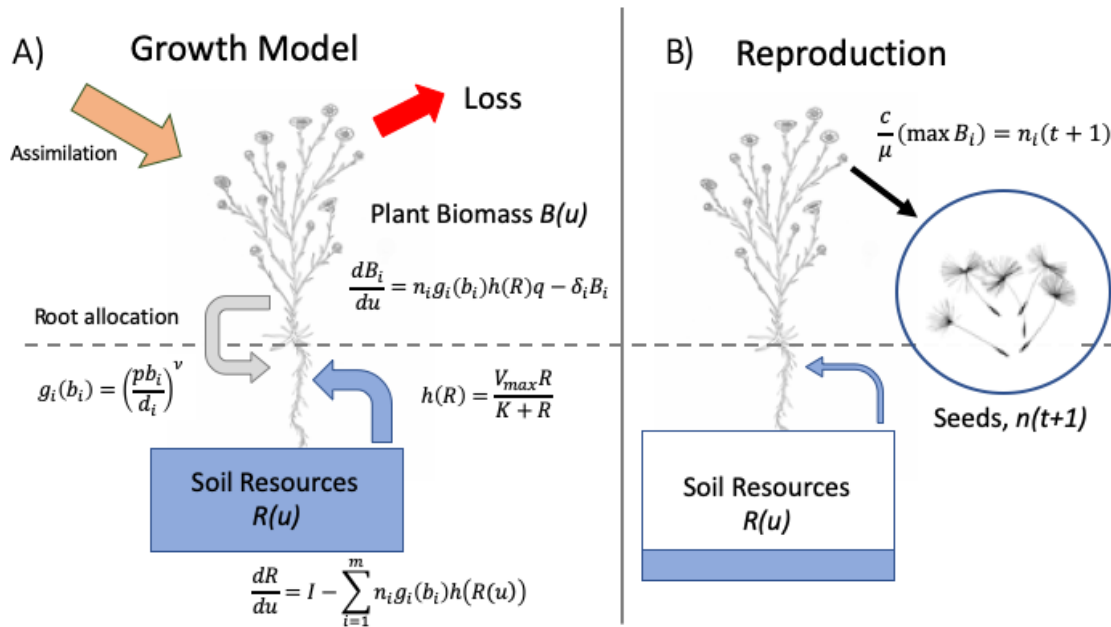

619

620 **Figure S 1 Diagram schematic of annual plant growth model used in simulation. A)**

621 **in the model each individual plant start as a seed, grows over the course of a single**

622 **growing season. Growth is a function of plant biomass, root surface area and soil**

623 **resource availability. B) Over time the soil resources are depleted and plant growth**

624 **slows down. Plants reach a maximum size when losses due to respiration and tissue**

625 **senescence are greater than growth. At this point the plants convert stored**

626 **resources to seeds. The number of seeds in the next growing season is determined as**

627 **the total mass of seeds produced per species divided by the weight of a single seed.**

628 **Supporting Information – Additional figures**

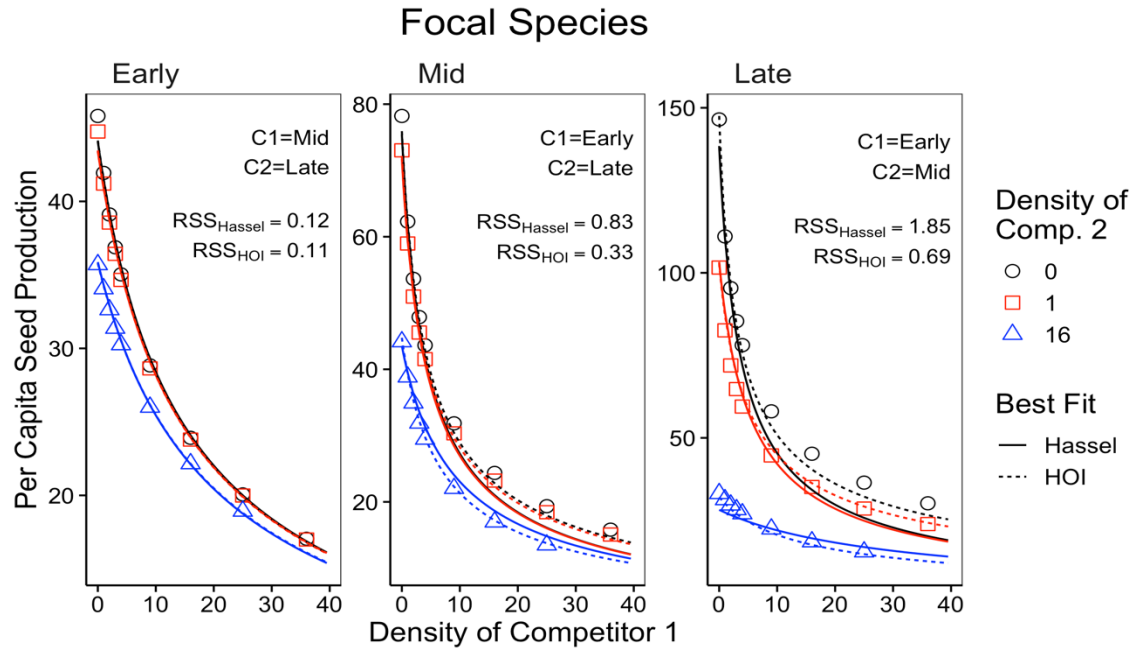

630 **Figure S 2 Simulated per capita seed production of the A) early, B) mid and C) late**  
631 **season species in response to density of two interspecific competitors. Densities of**  
632 **two competitors are shown in each panel—the x-axis shows the density of the first**  
633 **competitor, while different colored lines and shapes show the density of a second**  
634 **competitor. Text in each panel lists the identities of competitor one and two (early,**  
635 **mid or late). Lines show best fit from phenomenological models. Residual sum of**  
636 **squared error is shown for each model and focal species.**



## 637 **Appendix A – The effect of trait differences on higher order interactions**

638 We used an additional simulation experiment to test whether the strength of  
639 higher order interactions (HOIs) was associated with the magnitude of functional  
640 differences between competitor species. We started with the same parameter values as in  
641 the simulation in the main text in which there was a large difference between the species  
642 in root density ( $d_i$ ) and tissue respiration rate ( $\delta_i$ ). In four additional simulation scenarios,  
643 we gradually decreased the average difference between species in these traits (Table A1).  
644 Specifically, we held the traits of the mid-season species constant and decreased the  
645 difference in the root density trait,  $d_i$ , between the early and late-season species. We  
646 assumed a trade-off between root density and tissue respiration rate such that changing  
647 root density was accompanied by a change in tissue respiration rate,  $\delta_i$  (Figure A1). We  
648 quantified the average functional difference between species as the standard deviation of  
649 root density among all species. In each scenario, we simulated competition and fitted the  
650 phenomenological HOI model as in the main text. For each species in each scenario, we  
651 quantified the strength of HOIs as the average magnitude of the  $\beta$  coefficients divided by  
652 the average magnitude of the  $\alpha$  coefficients. For the mid and late season species, the  
653 strength of the HOIs increased with the functional difference between species (Figure A1  
654 B&C). For the early season species, HOIs were weak in all five scenarios (Figure A1 A).  
655 These simulations show that the functional differences between competitors drive the  
656 HOIs we observed in this system.

657 **Table A 1. Parameter values for five simulations with gradually decreasing the trait**  
 658 **difference between the early season and late season species. All other simulation**  
 659 **parameters are the same as in Table S1.**

| Functional Difference                                                              | Scenario | Species | Root density<br>$d$<br>(g cm <sup>-3</sup> ) | Respiration rate<br>$\delta_i$<br>(g g <sup>-1</sup> d <sup>-1</sup> ) | Standard deviation<br>of $d$ |        |
|------------------------------------------------------------------------------------|----------|---------|----------------------------------------------|------------------------------------------------------------------------|------------------------------|--------|
|  | Large    | 1       | Early                                        | 0.066                                                                  | 0.300                        | 0.1460 |
|                                                                                    |          | Mid     | 0.128                                        | 0.150                                                                  |                              |        |
|                                                                                    |          | Late    | 0.343                                        | 0.053                                                                  |                              |        |
|                                                                                    | 2        | Early   | 0.075                                        | 0.261                                                                  | 0.0821                       |        |
|                                                                                    |          | Mid     | 0.128                                        | 0.150                                                                  |                              |        |
|                                                                                    |          | Late    | 0.236                                        | 0.078                                                                  |                              |        |
|                                                                                    | 3        | Early   | 0.088                                        | 0.222                                                                  | 0.0467                       |        |
|                                                                                    |          | Mid     | 0.128                                        | 0.150                                                                  |                              |        |
|                                                                                    |          | Late    | 0.181                                        | 0.104                                                                  |                              |        |
|                                                                                    | 4        | Early   | 0.105                                        | 0.184                                                                  | 0.0208                       |        |
|                                                                                    |          | Mid     | 0.128                                        | 0.150                                                                  |                              |        |
|                                                                                    |          | Late    | 0.147                                        | 0.130                                                                  |                              |        |
|                                                                                    | Small    | 5       | Early                                        | 0.132                                                                  | 0.145                        | 0.0405 |
|                                                                                    |          |         | Mid                                          | 0.128                                                                  | 0.150                        |        |
|                                                                                    |          |         | Late                                         | 0.124                                                                  | 0.155                        |        |

660

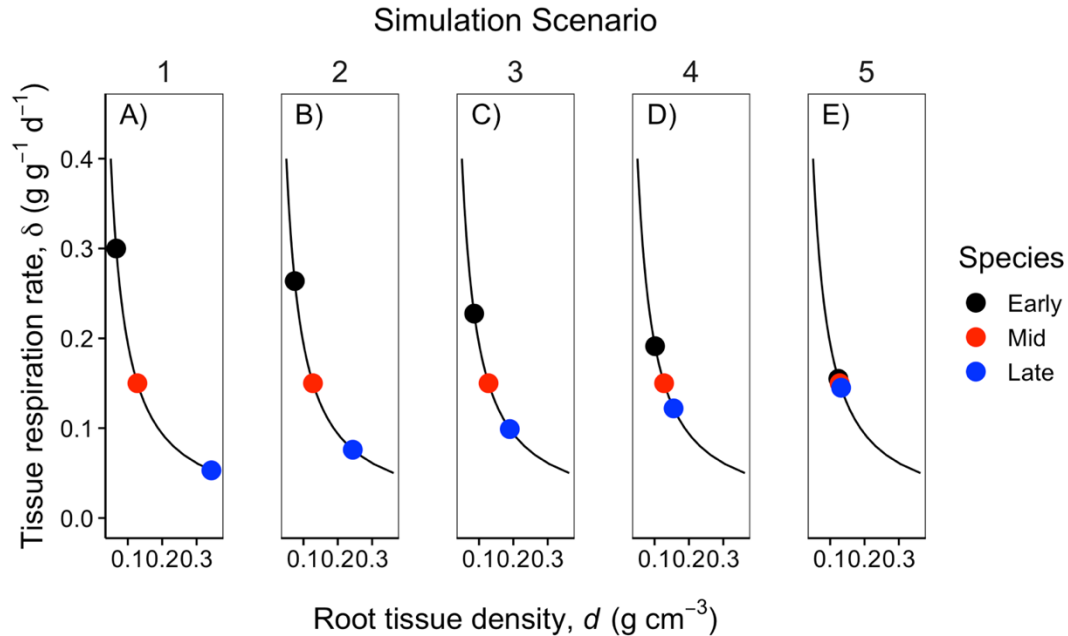

661

662 **Figure A 1. Colored points show the value of functional traits, root density and**  
663 **tissue loss rate, for each of the three species in each of the five simulation scenarios**  
664 **(A-E). Across the five scenarios, the differences between the early season and late**  
665 **season species' root density and respiration rates were gradually decreased. The**  
666 **mid-season species' traits were held constant. The black line indicates the trade-off**  
667 **between the root density and tissue respiration rate traits.**

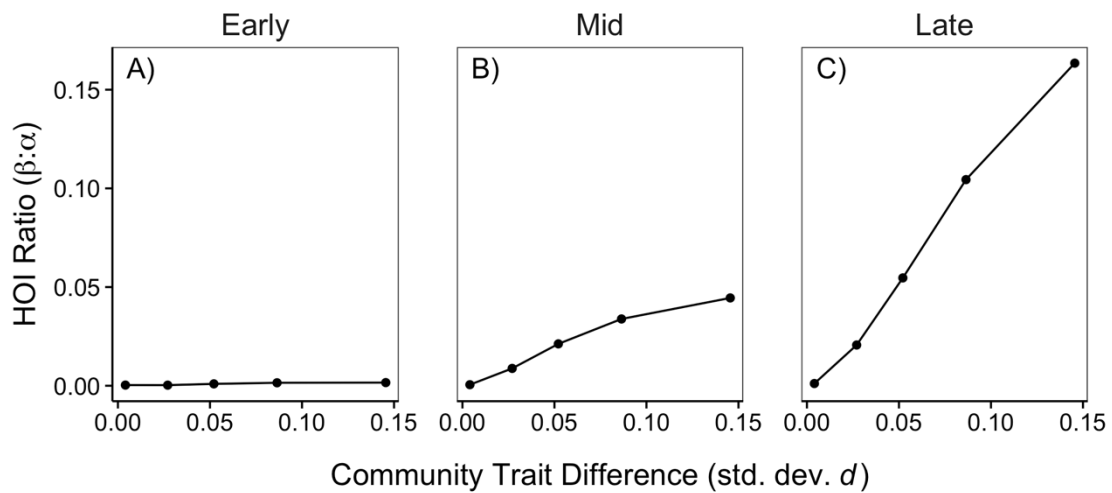

668

669 **Figure A 2. The strength of HOIs depends on the difference in species functional**  
670 **traits. The y-axis quantifies the strength of HOIs affecting the early (A), mid (B) and**  
671 **late (C) species as the ratio of the of the average magnitude of the  $\beta_{i(jk)}$  coefficients to**  
672 **the average magnitude of the  $\alpha$  coefficients in the phenomenological HOI model. A**  
673 **larger ratio  $\beta:\alpha$  ratio indicates stronger HOIs compared to pairwise interactions.**  
674 **The x-axis quantifies the community-level trait difference as the standard deviation**  
675 **of the root density trait,  $d$ .**

676
